# Supplementary material for: The Riemann Hypothesis Emerges in Dynamical Quantum Phase Transitions
Source: Research Square preprint supplement (doi:10.21203/rs.3.rs-8136886/v1), 2026-01-21
Supplement: Supplementary file 1 [file 0457a57ed5536b94b7b15b3f.pdf]

# Supplementary information for "The Riemann Hypothesis Emerges in Dynamical Quantum Phase Transitions"

Shijie Wei,<sup>1,\*</sup> Yue Zhai,<sup>2,3,†</sup> Quanfeng Lu,<sup>4,†</sup> Wentao Yang,<sup>4</sup> Pan Gao,<sup>1</sup> Chao Wei,<sup>2,3</sup> Junda Song,<sup>2,3</sup> Franco Nori,<sup>5,6</sup> Tao Xin,<sup>2,‡</sup> and Guilu Long<sup>4,7,1,§</sup>

<sup>1</sup>*Beijing Academy of Quantum Information Sciences, Beijing 100193, China*

<sup>2</sup>*International Quantum Academy, Futian District, Shenzhen, Guangdong 518048, China*

<sup>3</sup>*Shenzhen Institute for Quantum Science and Engineering,*

*Southern University of Science and Technology, Shenzhen 518055, China*

<sup>4</sup>*State Key Laboratory of Low-Dimensional Quantum Physics and*

*Department of Physics, Tsinghua University, Beijing 100084, China*

<sup>5</sup>*Center for Quantum Computing, RIKEN, Wakoshi, Saitama, 351-0198, Japan*

<sup>6</sup>*Quantum Research Institute, The University of Michigan, Ann Arbor, 48109-1040, MI, USA*

<sup>7</sup>*Tsinghua National Laboratory for Information Science and Technology, Beijing 100084, People's Republic of China*

## Contents

|                                                                                  |     |
|----------------------------------------------------------------------------------|-----|
| Supplementary Note 1. Asymptotic behavior of $S_N(s)$                            | S2  |
| Supplementary Note 2. Asymptotic behavior of $\mathcal{Z}(\beta, \mathcal{H}_0)$ | S3  |
| Supplementary Note 3. Construction of the preliminary oracles                    | S4  |
| Supplementary Note 4. Construction of the initial state                          | S6  |
| Supplementary Note 5. Construction of the evolution operator                     | S16 |
| Supplementary Note 6. Order of $ \chi(s) $ for $0 < \beta < 1$                   | S17 |
| Supplementary Note 7. Upper bound of $\zeta'(s)$ for $0 < \beta < 1$             | S18 |
| References                                                                       | S19 |

## Notation

For clarity, throughout this Supplementary Information, we use ‘log’ to denote the base-2 logarithm, and ‘ln’ to denote the natural logarithm (base  $e$ ). All variables  $s$  are assumed to satisfy  $\text{Re}(s) > 0$  and  $\text{Re}(s) \neq 1$ , ensuring the applicability of the alternating Dirichlet series.  $\beta$  denote the real part of  $s$  and  $t$  denote the imaginary part of  $s$ .

The Big-O notation  $\mathcal{O}(\cdot)$  represents the worst-case upper bound, while the Big-Theta notation  $\Theta(\cdot)$  denotes the exact asymptotic behavior. The notation  $\text{Poly}(\cdot)$  signifies that the growth follows a polynomial function of the input.

The symbol  $\|\cdot\|$  denotes the Euclidean norm on state vectors. The distance between two pure quantum states  $|\psi_a\rangle$  and  $|\psi_b\rangle$  is defined as  $d(|\psi_a\rangle, |\psi_b\rangle) = \min_{\theta \in \mathbb{R}} \|\psi_a - e^{i\theta} \psi_b\| = \sqrt{2(1 - |\langle \psi_a | \psi_b \rangle|)}$ , which satisfies the triangle inequality.

The distance between two unitary operators is defined as  $D(U_1, U_2) = \max_{|\psi\rangle} d(U_1|\psi\rangle, U_2|\psi\rangle)$ , which is the worst-case distance over all input states  $|\psi\rangle$ . We say that a quantum state (or unitary operator) is prepared to precision  $\kappa$  if its distance from the corresponding ideal target state (or ideal unitary) is at most  $\kappa$ .

---

\* [weisj@baqis.ac.cn](mailto:weisj@baqis.ac.cn); These authors contributed equally to this work.

† These authors contributed equally to this work.

‡ [xintao@iqasz.cn](mailto:xintao@iqasz.cn)

§ [gllong@tsinghua.edu.cn](mailto:gllong@tsinghua.edu.cn)

**Supplementary Note 1: Asymptotic behavior of  $S_N(s)$**

The  $N$ -term partial sum of the alternating Dirichlet series is

$$S_N(s) = \sum_{n=1}^N \frac{(-1)^{n-1}}{n^s}. \quad (1.1)$$

**Case 1.** At the nontrivial zeros of the zeta function, we have  $S_N(s) = -R_N(s)$ , where

$$R_N(s) = \sum_{n=N+1}^{\infty} \frac{(-1)^{n-1}}{n^s}. \quad (1.2)$$

Each term has the following integral representation,

$$\frac{1}{n^s} = \frac{1}{\Gamma(s)} \int_0^{\infty} \tau^{s-1} e^{-n\tau} d\tau, \quad (1.3)$$

yielding

$$R_N(s) = \sum_{n=N+1}^{\infty} \frac{(-1)^{n-1}}{n^s} = \frac{1}{\Gamma(s)} \int_0^{\infty} \tau^{s-1} \sum_{n=N+1}^{\infty} (-1)^{n-1} e^{-n\tau} d\tau = \frac{(-1)^N}{\Gamma(s)} \int_0^{\infty} \frac{\tau^{s-1} e^{-(N+1)\tau}}{1 + e^{-\tau}} d\tau. \quad (1.4)$$

Using the identity

$$\frac{1}{1 + e^{-\tau}} = \frac{1}{2} + \frac{1}{2} \tanh\left(\frac{\tau}{2}\right), \quad (1.5)$$

we obtain

$$R_N(s) = \frac{(-1)^N}{\Gamma(s)} \left[ \frac{1}{2} \int_0^{\infty} \tau^{s-1} e^{-(N+1)\tau} d\tau + \frac{1}{2} \int_0^{\infty} \tau^{s-1} e^{-(N+1)\tau} \tanh\left(\frac{\tau}{2}\right) d\tau \right]. \quad (1.6)$$

Let us define

$$M := \frac{1}{2} \int_0^{\infty} \tau^{s-1} e^{-(N+1)\tau} d\tau = \frac{1}{2} \Gamma(s) (N+1)^{-s}, \quad J := \frac{1}{2} \int_0^{\infty} \tau^{s-1} e^{-(N+1)\tau} \tanh\left(\frac{\tau}{2}\right) d\tau. \quad (1.7)$$

This leads to

$$R_N(s) = \frac{(-1)^N}{\Gamma(s)} (M + J) = (-1)^N \left( \frac{1}{2(N+1)^s} + \frac{J}{\Gamma(s)} \right), \quad (1.8)$$

We now show that for sufficiently large  $N$ ,

$$|J| \leq \frac{1}{4} \Gamma(s) (N+1)^{-\beta}, \quad s = \beta + it. \quad (1.9)$$

Fix  $A > 0$ , which depends on  $s$  but not on  $N$ , and split the integral for  $J$  at  $\tau = A/(N+1)$ :

$$J = \frac{1}{2} \left( \int_0^{A/(N+1)} \tau^{s-1} e^{-(N+1)\tau} \tanh\left(\frac{\tau}{2}\right) d\tau + \int_{A/(N+1)}^{\infty} \tau^{s-1} e^{-(N+1)\tau} \tanh\left(\frac{\tau}{2}\right) d\tau \right) := \frac{1}{2} (I_1 + I_2). \quad (1.10)$$

For  $I_1$ , we apply the inequality  $|\tanh(\tau/2)| \leq |\tau/2|$ , so

$$|I_1| \leq \int_0^{A/(N+1)} \tau^{\beta-1} e^{-(N+1)\tau} \frac{\tau}{2} d\tau = \frac{1}{2} (N+1)^{-(\beta+1)} \int_0^A u^{\beta} e^{-u} du = C_1(\beta, A) (N+1)^{-(\beta+1)}. \quad (1.11)$$

Here,  $C_1(\beta, A) := \frac{1}{2} \int_0^A u^{\beta} e^{-u} du$  is a constant depending on  $A$  and  $\beta$ . For  $I_2$ , we use the trivial bound  $|\tanh(\tau/2)| \leq 1$ , so

$$|I_2| \leq \int_{A/(N+1)}^{\infty} \tau^{\beta-1} e^{-(N+1)\tau} d\tau = (N+1)^{-\beta} \int_A^{\infty} u^{\beta-1} e^{-u} du = C_2(\beta, A) (N+1)^{-\beta}. \quad (1.12)$$

Here  $C_2(\beta, A) := \int_A^\infty u^{\beta-1} e^{-u} du$  is also a constant that depends on  $A$  and  $\beta$ .

Since  $\Gamma(s)$  is non-vanishing and  $C_2(\beta, A) \rightarrow 0$  as  $A \rightarrow \infty$ , we can choose  $A$  large enough so that

$$C_2(\beta, A) \leq \frac{1}{4} |\Gamma(s)|. \quad (1.13)$$

Thus,

$$|I_2| \leq \frac{1}{4} |\Gamma(s)| (N+1)^{-\beta}. \quad (1.14)$$

Combining the two contributions gives

$$|J| \leq \frac{1}{2} (|I_1| + |I_2|) \leq \frac{1}{2} \left( C_1(\beta, A) (N+1)^{-(\beta+1)} + \frac{1}{4} |\Gamma(s)| (N+1)^{-\beta} \right). \quad (1.15)$$

Consequently, for all  $N \geq N_0 := \lceil 4C_1(\beta, A)/|\Gamma(s)| \rceil$ ,

$$|J| \leq \frac{1}{4} |\Gamma(s)| (N+1)^{-\beta}, \quad \left| \frac{J}{\Gamma(s)} \right| \leq \frac{1}{4} (N+1)^{-\beta}. \quad (1.16)$$

Substituting this bound into Equation (1.8) gives for  $N \geq N_0$ ,

$$\frac{1}{4} (N+1)^{-\beta} \leq |R_N(s)| \leq \frac{3}{4} (N+1)^{-\beta}. \quad (1.17)$$

Therefore,

$$\lim_{N \rightarrow \infty} -\frac{1}{\log N} \ln |S_N(s)| = \lim_{N \rightarrow \infty} -\frac{1}{\log N} \ln |R_N(s)| = \beta \ln 2. \quad (1.18)$$

**Case 2.** For  $s$  with  $\zeta(s) \neq 0$ , the partial sums converge, and in particular

$$\lim_{N \rightarrow \infty} S_N(s) = (1 - 2^{1-s}) \zeta(s) \neq 0. \quad (1.19)$$

It follows that

$$-\lim_{N \rightarrow \infty} \frac{1}{\log N} \ln |S_N(s)| = 0. \quad (1.20)$$

Thus, we obtain the final result:

$$-\lim_{N \rightarrow \infty} \frac{1}{\log N} \ln |S_N(s)| = \begin{cases} \beta \ln 2, & \text{if } \zeta(s) = 0, \\ 0, & \text{if } \zeta(s) \neq 0. \end{cases} \quad (1.21)$$

## Supplementary Note 2: Asymptotic behavior of $\mathcal{Z}(\beta, \mathcal{H}_0)$

The partition function can be written as

$$\mathcal{Z}(\beta, \mathcal{H}_0) = \sum_{n=1}^N n^{-\beta}. \quad (2.1)$$

**Case 1.** For  $\beta > 1$ ,  $\mathcal{Z}(\beta, \mathcal{H}_0)$  converges as

$$\lim_{N \rightarrow \infty} \mathcal{Z}(\beta, \mathcal{H}_0) = \zeta(\beta). \quad (2.2)$$

Thus,

$$\lim_{N \rightarrow \infty} -\frac{1}{\log N} \ln \mathcal{Z}(\beta, \mathcal{H}_0) = 0. \quad (2.3)$$

**Case 2.** For  $0 < \beta < 1$ , the series diverges. Specifically,

$$\int_1^{N+1} x^{-\beta} dx \leq \sum_{n=1}^N n^{-\beta} \leq 1 + \int_1^N x^{-\beta} dx, \quad (2.4)$$

which simplifies to

$$\frac{(N+1)^{1-\beta} - 1}{1-\beta} \leq \mathcal{Z}(\beta, \mathcal{H}_0) \leq 1 + \frac{N^{1-\beta} - 1}{1-\beta}, \quad (2.5)$$

yielding

$$-\lim_{N \rightarrow \infty} \frac{1}{\log N} \ln \mathcal{Z}(\beta, \mathcal{H}_0) = (\beta - 1) \ln 2. \quad (2.6)$$

Thus,

$$-\lim_{N \rightarrow \infty} \frac{1}{\log N} \ln \mathcal{Z}(\beta, \mathcal{H}_0) = \begin{cases} (\beta - 1) \ln 2, & 0 < \beta < 1, \\ 0, & \beta > 1. \end{cases} \quad (2.7)$$

### Supplementary Note 3: Construction of the preliminary oracles

This section details the construction of polynomial and logarithm oracles, which serve as foundational components for subsequent quantum state preparation and time evolution operators in our quantum algorithms.

**Lemma 3.1** (Polynomial oracle (Methods, Lemma 1)). *Let  $O(f)$  denote an oracle implementing the transformation*

$$\sum_x \alpha_x |x\rangle |0\rangle \mapsto \sum_x \alpha_x |x\rangle |f(x)\rangle, \quad (3.1)$$

where  $f(x)$  is a polynomial of degree at most  $D$ . Suppose the coefficients of  $f$  and the input  $x$  are specified to  $a_1$  and  $a_2$  significant digits, respectively. The output is encoded with  $r_1$  integer qubits and  $r_2$  fractional qubits. Then  $O(f)$  can be implemented using

$$\mathcal{O}(D^2 a_2^2 + D^2 a_1 a_2 + D(r_1 + r_2)) \text{ gates, and } (2Da_2 + a_1) \text{ ancilla qubits.}$$

*Proof.* Write the polynomial as  $f(n) = \sum_{d=0}^D c_d n^d$ . Evaluation proceeds through sequential construction of the monomials  $x^d$ , multiplication by coefficients  $c_d$ , and accumulation of the results.

**Step 1: Computation of Monomials.** Multiplying an  $m_1$ -qubit register by an  $m_2$ -qubit register requires  $\mathcal{O}(m_1 m_2)$  gates and  $\mathcal{O}(m_1 + m_2)$  qubits using quantum schoolbook multiplication<sup>1</sup>. To compute  $x^{d+1}$  from  $x^d$ , a  $da_2$ -qubit register (storing  $x^d$ ) is multiplied by an  $a_2$ -qubit register (storing  $x$ ). The total gate cost for generating monomials up to degree  $D$  is

$$2 \sum_{d=1}^{D-1} a_2 \cdot da_2 = \mathcal{O}(D^2 a_2^2), \quad (3.2)$$

where the factor 2 arises from uncomputing intermediate results and resetting ancilla qubits.

**Step 2: Multiplication by coefficients.** Multiplying a degree- $d$  monomial (which requires  $da_2$  qubits) by  $c_d$  costs  $\mathcal{O}(da_1 a_2)$  gates. Summing over all degrees gives

$$2 \sum_{d=1}^D da_1 a_2 = \mathcal{O}(D^2 a_1 a_2), \quad (3.3)$$

again with the factor 2 from uncomputation.

**Step 3: Accumulation of output.** The results are accumulated into an output register of size  $r_1 + r_2$ . Each of the  $D+1$  additions costs  $\mathcal{O}(r_1 + r_2)$  gates, yielding a total gate cost of  $\mathcal{O}(D(r_1 + r_2))$ . Adding all contributions yields a total gate complexity

$$\mathcal{O}(D^2 a_2^2 + D^2 a_1 a_2 + D(r_1 + r_2)). \quad (3.4)$$

During computation, at most  $Da_2$  qubits are used for monomial storage and  $(Da_2 + a_1)$  for intermediate products, giving a total ancilla requirement of  $(2Da_2 + a_1)$ .  $\square$

**Lemma 3.2** (Logarithm oracle (Methods, Lemma 2)). *Let  $L$  denote an oracle implementing the transformation*

$$\sum_{n=1}^N \alpha_n |n\rangle |0\rangle \mapsto \sum_{n=1}^N \alpha_n |n\rangle |\widetilde{\log(n)}\rangle, \quad (3.5)$$

where  $\widetilde{\log(n)}$  approximates  $\log(n)$  to within error  $\eta$ . Then  $L$  can be implemented using  $\mathcal{O}((\log N)^3 \log^2(1/\eta))$  gates and  $\mathcal{O}((\log N)^2 \log(1/\eta))$  ancilla qubits.

*Proof.* We proceed constructively.

**Step 1: Input Partitioning.** Define  $k_1 = \lceil \log(\frac{N+1}{3}) \rceil$ . For  $3 \leq n < 3 \cdot 2^{k_1}$ , partition the integers into  $k_1$  subsets, defined as

$$P_\nu : \quad 3 \cdot 2^{\nu-1} \leq n_\nu < 3 \cdot 2^\nu, \quad 1 \leq \nu \leq k_1. \quad (3.6)$$

Each  $3 \leq n \leq N$  lies in exactly one partition  $P_\nu$ . For  $n_\nu \in P_\nu$ , define

$$d = \frac{n_\nu - 2^{\nu+1}}{2^{\nu+1}}, \quad -\frac{1}{4} \leq d < \frac{1}{2}. \quad (3.7)$$

This allows the logarithm to be expressed as

$$\log(n_\nu) = \log(2^{\nu+1}) + \log(1+d). \quad (3.8)$$

**Step 2: Taylor expansion of  $\log(1+d)$ .** Using the Taylor series expansion for  $\log(1+d)$ , we have:

$$\log(1+d) = \frac{1}{\ln 2} \sum_{j=1}^{\infty} \frac{(-1)^{j+1}}{j} d^j. \quad (3.9)$$

The remainder after  $l_1$  terms satisfies

$$\left| \sum_{j=l_1+1}^{\infty} \frac{(-1)^{j+1}}{j} d^j \right| \leq \sum_{j=l_1+1}^{\infty} \frac{1}{j} \left(\frac{1}{2}\right)^j \leq \frac{1}{2^{l_1}}. \quad (3.10)$$

Hence, truncating after  $l_1 = \lceil \log(1/\eta) \rceil + 2$  terms yields an approximation error of less than  $\frac{\eta}{2}$ . Coefficients stored to  $\lceil \log(2/\eta) \rceil$  fractional bits introduce an additional rounding error bounded by

$$\frac{\eta}{2} \left(1 + \frac{1}{2} + \left(\frac{1}{2}\right)^2 + \dots\right) \leq \frac{\eta}{2}, \quad (3.11)$$

giving total error of less than  $\eta$ . The resulting approximation

$$\widetilde{\log(n_\nu)} = \nu + 1 + \frac{1}{\ln(2)} \sum_{j=1}^{l_1} \frac{(-1)^{j+1}}{j} d^j \quad (3.12)$$

is thus approximated within error  $\eta$ .

The partition index  $\nu$  is determined using multi-controlled operations that compare  $n$  with partition bounds. Each such comparison uses at most  $\mathcal{O}(k_1)$  Toffoli gates and  $\mathcal{O}(k_1)$  ancilla qubits. A flag register composing of at most  $\mathcal{O}(k_1)$  qubits marks the unique partition  $P_\nu$  containing  $n$ . This flag controls addition of the corresponding polynomial output to the output register. Exactly one flag is set for each input across  $3 \leq n \leq N$ .

For each  $\nu$ , Equation (3.12) is a degree- $l_1$  polynomial in  $d$ , with coefficients specified to  $\lceil \log(2/\eta) \rceil$  qubits and input  $d$  to  $(k_1 + 2)$  significant digits. The output requires  $(\lceil \log k_1 \rceil + 2)$  integer qubits and  $\lceil \log(1/\eta) \rceil$  fractional qubits. Applying Lemma 3.1, evaluating this polynomial within a partition requires

$$\mathcal{O}(l_1^2 k_1^2 + l_1^2 k_1 \log(2/\eta) + l_1 (\log(k_1) + \log(1/\eta))) = \mathcal{O}(k_1^2 \log^2(1/\eta)) \quad (3.13)$$

gates, and

$$2l_1 k_1 + \log(1/\eta) = \mathcal{O}(k_1 \log(1/\eta)) \quad (3.14)$$

ancilla qubits. Summing over all  $k_1$  partitions gives total resource requirements:

$$\mathcal{O}(k_1^3 \log^2(1/\eta)) = \mathcal{O}((\log N)^3 \log^2(1/\eta)) \text{ gates}, \quad \mathcal{O}(k_1^2 \log(1/\eta)) = \mathcal{O}((\log N)^2 \log(1/\eta)) \text{ ancilla qubits}. \quad (3.15)$$

The special cases  $n = 1, 2$  can be handled separately at negligible cost.  $\square$

### Supplementary Note 4: Construction of the initial state

This section details the construction of the initial state, which is outlined as follows:

Our first key result is provided in Theorem 4.2 (Methods, Theorem 1), which describes the preparation of the truncated state  $|\psi_0\rangle_1$ . Central to this construction is the angle-preparation oracle (Methods, Theorem 2) that computes the required rotation angles. Its action is defined in Definition 4.3 and its implementation is outlined in Theorem 4.4. A central subroutine of this oracle is the evaluation of a zeta function related partial sum (Lemma 4.7), built upon Proposition 4.5 with detailed calculations given in Propositions 4.8 and 4.9.

Our second key result, Theorem 4.11 (Methods, Theorem 3), presents the construction of our initial state  $|\psi_0\rangle$ . Starting with the truncated state  $|\psi_0\rangle_1$  prepared in Theorem 4.2, we extend it via the Linear Combination of Unitaries (LCU) method to combine it with  $|\psi_0\rangle_2$  (Corollary 4.10); a final post-selection removes the high-index component  $|\psi_0\rangle_3$ , yielding the desired initial state.

**Definition 4.1.** *The controlled-rotation gate  $\mathcal{CR}$  implements the transformation*

$$\sum_{\theta} \alpha_{\theta} |\theta\rangle |0\rangle \mapsto \sum_{\theta} \alpha_{\theta} |\theta\rangle (\cos \theta |0\rangle + \sin \theta |1\rangle). \quad (4.1)$$

*It can be implemented using a sequence of controlled- $R_x$  rotations, each conditioned on a qubit of the register encoding  $\theta$ , followed by a phase gate on the target qubit.*

**Theorem 4.2** (Truncated state preparation (Methods, Theorem 1)). *Let  $\beta > 0$ ,  $\beta \neq 1$ , and let  $n_0, n_1 \in \mathbb{N}$  with  $n_1 - n_0 = 2^k$  for some integer  $k > 0$ . Define*

$$|\psi_0\rangle_1 = \frac{1}{C_1} \sum_{n=n_0}^{n_1-1} n^{-\beta/2} |n - n_0\rangle, \quad C_1 = \sqrt{\sum_{n=n_0}^{n_1-1} n^{-\beta}}. \quad (4.2)$$

*Then  $|\psi_0\rangle_1$  can be prepared on a standard gate-based quantum computer to precision  $\varepsilon > 0$ , using a number of gates and ancilla qubits bounded by*

$$\text{Poly}\left(\log(1/\varepsilon), \log(n_1), \log\left(\frac{1}{|1-\beta|}\right), \beta, v\right), \quad (4.3)$$

*where  $v$  denotes the number of significant digits used to represent  $\beta$ . The parameters are required to satisfy*

$$c = \left\lceil \frac{1}{2} \log_{2\pi} \left( \frac{8}{\varepsilon} \right) \right\rceil, \quad n_0 > \lceil \beta + 2c \rceil. \quad (4.4)$$

*Proof sketch.* We adapt Grover's recursive amplitude-splitting method<sup>2</sup>, replacing integration with partial summation. The  $2^k$  computational basis states are encoded on  $k$  qubits initialized in  $|0\rangle^{\otimes k}$ . At iteration step  $m$  ( $0 \leq m \leq k-1$ ), each bit string  $w \in \{0, 1\}^m$  is split into two branches  $w0$  and  $w1$ . Define

$$c_w = \frac{1}{C} \sqrt{\sum_{i=0}^{2^{k-m}-1} (2^{k-m}w + i + n_0)^{-\beta}}. \quad (4.5)$$

Normalization is preserved, as

$$c_{w0} = \frac{1}{C} \sqrt{\sum_{i=0}^{2^{k-m-1}-1} (2^{k-m}w + i + n_0)^{-\beta}}, \quad c_{w1} = \frac{1}{C} \sqrt{\sum_{i=0}^{2^{k-m-1}-1} (2^{k-m}(w+1) + i + n_0)^{-\beta}}, \quad (4.6)$$

satisfy  $c_{w0}^2 + c_{w1}^2 = c_w^2$ . For each  $w$ , we compute a rotation angle  $\theta_{w,m}$  such that the amplitude split  $c_w \mapsto (c_{w0}, c_{w1})$  can be implemented by a  $\mathcal{CR}$  gate acting on the next qubit. All rotations corresponding to strings of the same length

$m$  are applied in parallel. The transformation at step  $m$  is written as

$$\begin{aligned}
& \sum_{w \in \{0,1\}^m} c_w |w\rangle |0\rangle^{\otimes(k-m)} |0\rangle \\
& \xrightarrow{U_m} \sum_w c_w |w\rangle |0\rangle^{\otimes(k-m)} |\theta_{w,m}\rangle \\
& \xrightarrow{\mathcal{CR}} \sum_w c_w |w\rangle (\cos \theta_{w,m} |0\rangle + \sin \theta_{w,m} |1\rangle) |0\rangle^{\otimes(k-m-1)} |\theta_{w,m}\rangle \\
& \xrightarrow{U_m^\dagger} \sum_w (c_{w_0} |w0\rangle + c_{w_1} |w1\rangle) |0\rangle^{\otimes(k-m-1)} |0\rangle.
\end{aligned} \tag{4.7}$$

Here,  $U_m$  denote an oracle that computes  $\theta_{w,m}$  into an angle register, which is uncomputed after applying  $\mathcal{CR}$  gate. Iterating the transformation in Equation (4.7) for  $m = 0, 1, \dots, k-1$  yields the desired state

$$|\psi_0\rangle = \frac{1}{C} \sum_{n=n_0}^{n_1-1} n^{-\beta/2} |n - n_0\rangle. \tag{4.8}$$

Thus, the central task reduces to constructing  $U_m$ , defined as follows. □

**Definition 4.3** (Angle-preparation oracle  $U_m$ ). *The gate  $U_m$  implements the transformation*

$$\sum_{w \in \{0,1\}^m} \alpha_w |w\rangle |0\rangle \mapsto \sum_{w \in \{0,1\}^m} \alpha_w |w\rangle |\theta_{w,m}\rangle, \tag{4.9}$$

where the rotation angle  $\theta_{w,m}$  satisfies

$$\tan^2(\theta_{w,m}) = \frac{c_{w1}^2}{c_{w0}^2} = \frac{\sum_{i=0}^{2^{k-m-1}-1} (2^{k-m-1}(2w+1) + i + n_0)^{-\beta}}{\sum_{i=0}^{2^{k-m-1}-1} (2^{k-m-1}(2w) + i + n_0)^{-\beta}} = \frac{S(2^{k-m-1}(2w+1) + n_0, 2^{k-m-1}(2w+2) - 1 + n_0, \beta)}{S(2^{k-m-1}(2w) + n_0, 2^{k-m-1}(2w+1) - 1 + n_0, \beta)}, \tag{4.10}$$

with

$$S(a, b, \beta) = \sum_{n=a}^b n^{-\beta}. \tag{4.11}$$

Equivalently,

$$\begin{aligned}
\theta_{w,m} &= \arctan \left( \sqrt{\frac{S(2^{k-m-1}(2w+1) + n_0, 2^{k-m-1}(2w+2) - 1 + n_0, \beta)}{S(2^{k-m-1}(2w) + n_0, 2^{k-m-1}(2w+1) - 1 + n_0, \beta)}} \right) \\
&= \arcsin \left( \sqrt{\frac{S(2^{k-m-1}(2w+1) + n_0, 2^{k-m-1}(2w+2) - 1 + n_0, \beta)}{S(2^{k-m-1}(2w) + n_0, 2^{k-m-1}(2w+2) - 1 + n_0, \beta)}} \right).
\end{aligned} \tag{4.12}$$

*Notation.* In practice,  $U_m$  computes an approximation  $\tilde{\theta}_{w,m}$ , which results in an error in the state preparation. The deviation between the ideal and approximate states at step  $m$  is bounded as follows:

$$\begin{aligned}
& \left\| \sum_w c_w |w\rangle (\cos(\theta_{w,m}) |0\rangle + \sin(\theta_{w,m}) |1\rangle) |0\rangle^{\otimes(k-m-1)} |0\rangle - \sum_w c_w |w\rangle (\cos(\tilde{\theta}_{w,m}) |0\rangle + \sin(\tilde{\theta}_{w,m}) |1\rangle) |0\rangle^{\otimes(k-m-1)} |0\rangle \right\| \\
&= \left\| \sum_w c_w |w\rangle [(\cos(\tilde{\theta}_{w,m}) - \cos(\theta_{w,m})) |0\rangle + (\sin(\tilde{\theta}_{w,m}) - \sin(\theta_{w,m})) |1\rangle] \right\| \\
&= \sqrt{\sum_w c_w^2 \cdot 4 \sin^2 \left( \frac{\tilde{\theta}_{w,m} - \theta_{w,m}}{2} \right)} \\
&\leq \max_w |\tilde{\theta}_{w,m} - \theta_{w,m}|.
\end{aligned} \tag{4.13}$$

To achieve overall precision  $\varepsilon$ , each  $\theta_{w,m}$  must be computed with an error of at most  $\varepsilon/k$  over all  $m$ . The  $\mathcal{CR}$  gate is decomposed into controlled- $R_x$  rotations conditioned on the qubits encoding  $\theta_{w,m}$ , followed by a phase gate, requiring  $\mathcal{O}(\log(k/\varepsilon))$  gates and no ancilla qubits. Therefore, the dominant resource cost comes from implementing  $U_m$  to an accuracy of  $\varepsilon/k$ .

**Theorem 4.4** (Implementation of oracle  $U_m$  (Methods, Theorem 2)). *The gate  $U_m$ , as defined in Definition 4.3, can be implemented such that each rotation angle is estimated to within error  $\varepsilon/k$ , using a number of gates and ancilla qubits bounded by*

$$\text{Poly}\left(\log(1/\varepsilon), \log(n_1), \log \frac{1}{|1-\beta|}, \beta, v\right), \quad (4.14)$$

where  $v$  denotes the number of significant digits used to represent  $\beta$ .

*Proof.* The angle  $\theta_{w,m}$ , represented with  $\log(k/\varepsilon)$  qubits, is determined using a bisection procedure applied iteratively on each qubit. For a trial angle  $\theta_g$ , we compare

$$\sin^2(\theta_g)S(2^{k-m-1}2w + n_0, 2^{k-m-1}(2w+2) - 1 + n_0, \beta), \quad (4.15)$$

$$\text{with } S(2^{k-m-1}(2w+1) + n_0, 2^{k-m-1}(2w+2) - 1 + n_0, \beta). \quad (4.16)$$

This comparison decides whether  $\theta_{w,m} > \theta_g$ . After  $\log(k/\varepsilon)$  comparison,  $\theta_{w,m}$  is computed to within error  $\varepsilon/k$ . Define

$$d = \sin^2(\theta_g)S(2^{k-m-1} \cdot 2w + n_0, 2^{k-m-1}(2w+2) - 1 + n_0, \beta) - S(2^{k-m-1}(2w+1) + n_0, 2^{k-m-1}(2w+2) - 1 + n_0, \beta). \quad (4.17)$$

Since  $S(a, b, \beta) \geq n_1^{-\beta}$  and relevant angles  $\theta$  satisfy  $\theta + \frac{\varepsilon}{k} < \frac{\pi}{4}$ , consider two angles differing by at least  $\varepsilon/k$ . The difference in  $\sin^2 \theta$ :

$$\sin^2(\theta + \frac{\varepsilon}{k}) - \sin^2(\theta) = (\sin(\theta + \frac{\varepsilon}{k}) - \sin(\theta))(\sin(\theta + \frac{\varepsilon}{k}) + \sin(\theta)) > \frac{\sqrt{2}\varepsilon}{2k} \sin(\frac{\varepsilon}{k}) > \frac{\varepsilon^2}{2k^2}. \quad (4.18)$$

Thus, angles differing by  $\varepsilon/k$  yield a difference in  $d$  of at least  $\frac{\varepsilon^2}{2k^2}n_1^{-\beta}$ . To distinguish such angles correctly, the error in  $d$  must be less than  $\frac{\varepsilon^2}{2k^2}n_1^{-\beta}$ . Since  $S(a, b, \beta) \leq n_1$ , requirements:

$$(1) \text{ computing } S \text{ to precision } \frac{\varepsilon^2 n_1^{-\beta}}{12k^2}, \quad (2) \sin^2 \theta_g \text{ to precision } \frac{\varepsilon^2 n_1^{-1-\beta}}{12k^2},$$

ensures the total error meets this requirement.

**Step 1: Calculation of  $\sin^2(\theta)$ .** Using the expansion

$$\sin^2(\theta) = \frac{1 - \cos(2\theta)}{2} = \sum_{n=1}^{\infty} d_n \theta^{2n}, \quad d_n = \frac{(-1)^{n+1} 2^{2n}}{2(2n)!}, \quad (4.19)$$

we approximate  $\sin^2(\theta)$  for  $\theta < \frac{\pi}{4}$ . Truncating after  $l_2 > 5$  terms, the error is:

$$\frac{(\frac{\pi}{2})^{2l_2+2}}{2(2l_2+2)!} < \frac{(\frac{\pi}{2})^{2l_2+2}}{(\frac{2l_2+2}{e})^{2l_2+2}} = \left(\frac{e\pi}{4l_2+4}\right)^{2l_2+2} < \left(\frac{1}{2}\right)^{l_2}, \quad (4.20)$$

using Stirling's approximation. To achieve precision  $\frac{\varepsilon^2 n_1^{-1-\beta}}{24k^2}$ , we choose:

$$l_2 = 2 \log\left(\frac{k}{\varepsilon}\right) + (1 + \beta) \log(n_1) + 5. \quad (4.21)$$

Storing coefficients  $d_n$  to precision  $\frac{\varepsilon^2 n_1^{-1-\beta}}{96k^2}$  ensures that the rounding error is bounded by:

$$\frac{\varepsilon^2 n_1^{-1-\beta}}{96k^2} \left(\frac{\pi}{4} + \left(\frac{\pi}{4}\right)^2 + \dots\right) < \frac{\varepsilon^2 n_1^{-1-\beta}}{24k^2}. \quad (4.22)$$

Thus, the total truncation and rounding error is within  $\frac{\varepsilon^2 n_1^{-1-\beta}}{12k^2}$ , satisfying the requirement (1).



The expression approximating  $\sin^2(\theta)$  is a polynomial of degree  $2l_2$ . The parameter  $\theta$  is encoded using  $\log\left(\frac{k}{\varepsilon}\right)$  qubits, the coefficients require  $\log\left(\frac{\varepsilon^2 n_1^{-1-\beta}}{96k^2}\right)$  qubits, and the output requires  $\frac{\varepsilon^2 n_1^{-1-\beta}}{12k^2}$  qubits. By Lemma 3.1, the gate complexity is

$$4\log^2\left(\frac{k}{\varepsilon}\right)l_2^2 + 4\log\left(\frac{k}{\varepsilon}\right)\log\left(\frac{96k^2 n_1^{1+\beta}}{\varepsilon^2}\right)l_2^2 + 2l_2\log\left(\frac{12k^2 n_1^{1+\beta}}{\varepsilon^2}\right) = \text{Poly}(\log(n_1), \log(1/\varepsilon), \beta), \quad (4.23)$$

and the ancilla qubit count is

$$4l_2\log\left(\frac{k}{\varepsilon}\right) + \log\left(\frac{96k^2 n_1^{1+\beta}}{\varepsilon^2}\right) = \text{Poly}(\log(n_1), \log(1/\varepsilon), \beta). \quad (4.24)$$

**Step 2: Estimation of  $S$ .** We will prove Lemma 4.7, which states that the partial sum  $S(a, b, \beta)$  can be computed to precision  $\epsilon$  with:

$$\text{Poly}\left(\log(1/\epsilon), \log n_1, \log\left(\frac{1}{|1-\beta|}\right), v\right) \quad (4.25)$$

gates and ancilla qubits, where  $v$  denotes the significant digits of  $\beta$ . To satisfy requirement (2), we set  $\epsilon = \frac{\varepsilon^2 n_1^{-\beta}}{12k^2}$  and the complexity becomes:

$$\text{Poly}\left(\log\left(\frac{12k^2 n_1^\beta}{\varepsilon^2}\right), \log(n_1), \log\left(\frac{1}{|1-\beta|}\right), v\right) = \text{Poly}\left(\log(1/\varepsilon), \log(n_1), \log\left(\frac{1}{|1-\beta|}\right), \beta, v\right).$$

Conclusively, we give a total count of required resourced for constructing  $U_m$ . The bisection procedure requires  $\lceil \log(k/\varepsilon) \rceil$  comparisons to compute  $\theta_{w,m}$  to precision  $\varepsilon/k$ . Each comparison involves two evaluations of  $S$  (for the partial sums in (4.15) and (4.16)) and one evaluation of  $\sin^2 \theta_g$ . Thus, the total resource cost for  $U_m$  is multiplied by a factor of  $\mathcal{O}(\log(k/\varepsilon))$ , which is absorbed into the overall polynomial complexity. Combining the resource costs from Steps 1 and 2 (concluded in Equation (4.23),(4.24),(4.25)), the total gate and ancilla qubit complexity for implementing the oracle  $U_m$  is bounded by

$$\text{Poly}\left(\log(1/\varepsilon), \log(n_1), \log\frac{1}{|1-\beta|}, \beta, v\right), \quad (4.26)$$

as stated. As a preliminary step of Lemma 4.7, an approximation of  $S$  is introduced in Proposition 4.5.  $\square$

**Proposition 4.5** (Euler–Maclaurin approximation of  $S$ ). *For  $\beta > 0$ ,  $\beta \neq 1$ , and integers  $a \leq b$ , there exists an approximation  $\widetilde{S(a, b, \beta)}$  to the partial sum  $S(a, b, \beta) = \sum_{n=a}^b n^{-\beta}$ , such that*

$$\left|S(a, b, \beta) - \widetilde{S(a, b, \beta)}\right| < \frac{\epsilon}{2}, \quad (4.27)$$

where

$$\widetilde{S(a, b, \beta)} = \frac{1}{1-\beta}(b^{1-\beta} - a^{1-\beta}) + \frac{a^{-\beta} + b^{-\beta}}{2} - \sum_{r=1}^{l_3} \frac{B_{2r}\Gamma(\beta+2r-1)}{(2r)!\Gamma(\beta)}(b^{-\beta-2r+1} - a^{-\beta-2r+1}), \quad (4.28)$$

with  $l_3 = \lceil \frac{1}{2} \log_{2\pi} \frac{8}{\epsilon} \rceil$ , provided  $a > \lceil \beta + 2m \rceil$ .

*Proof.* Recall the Euler–Maclaurin summation formula:

$$\sum_{k=a}^b f(k) = \int_a^b f(x) dx + \frac{f(a) + f(b)}{2} + \sum_{r=1}^{l_3} \frac{B_{2r}}{(2r)!} \left( f^{(2r-1)}(b) - f^{(2r-1)}(a) \right) + R_{l_3}, \quad (4.29)$$

where  $B_{2r}$  are Bernoulli Numbers, and the remainder is given by

$$R_{l_3} = \frac{(-1)^{l_3+1}}{(2l_3)!} \int_a^b B_{2l_3}(x - \lfloor x \rfloor) f^{(2l_3)}(x) dx. \quad (4.30)$$

Setting  $f(x) = x^{-\beta}$ , we have

$$\begin{aligned} S(a, b, \beta) &= \int_a^b x^{-\beta} dx + \frac{a^{-\beta} + b^{-\beta}}{2} + \sum_{r=1}^{l_3} \frac{B_{2r}}{(2r)!} (-1)^{2r-1} \left( \prod_{i=0}^{2r-2} (\beta + i) \right) (b^{-\beta-2r+1} - a^{-\beta-2r+1}) + R_{l_3} \\ &= \frac{1}{1-\beta} (b^{1-\beta} - a^{1-\beta}) + \frac{a^{-\beta} + b^{-\beta}}{2} - \sum_{r=1}^{l_3} \frac{B_{2r} \Gamma(\beta + 2r - 1)}{(2r)! \Gamma(\beta)} (b^{-\beta-2r+1} - a^{-\beta-2r+1}) + R_{l_3}, \end{aligned} \quad (4.31)$$

in which the reminder term is given by

$$R_{l_3} = \frac{(-1)^{l_3+1}}{(2l_3)!} \int_a^b B_{2l_3}(x - \lfloor x \rfloor) \frac{\Gamma(\beta + 2l_3)}{\Gamma(\beta)} x^{-\beta-2l_3} dx. \quad (4.32)$$

Using the bound on Bernoulli numbers:

$$\frac{2(2l_3)!}{(2\pi)^{2l_3}} \frac{1}{1 - 2^{-2l_3}} < |B_{2l_3}| = \frac{2(2l_3)!}{(2\pi)^{2l_3}} \zeta(2l_3) < \frac{2(2l_3)!}{(2\pi)^{2l_3}} \frac{1}{1 - 2^{1-2l_3}}, \quad (4.33)$$

we obtain

$$\begin{aligned} |R_{l_3}| &\leq \frac{|B_{2l_3}|}{(2l_3)!} \beta(\beta+1) \cdots (\beta+2l_3-1) \int_a^b x^{-\beta-2l_3} dx \\ &= \left| \frac{\beta(\beta+1) \cdots (\beta+2l_3-1) B_{2l_3} (a^{-\beta-2l_3+1} - b^{-\beta-2l_3+1})}{(2l_3)! (\beta+2l_3-1)} \right| \\ &< \frac{\beta(\beta+1) \cdots (\beta+2l_3-2) 2a^{-\beta-2l_3+1}}{(2\pi)^{2l_3} (1 - 2^{1-2l_3})} \\ &< \frac{4}{(2\pi)^{2l_3}} \frac{\beta(\beta+1) \cdots (\beta+2l_3-2)}{a^{\beta+2l_3-1}}. \end{aligned} \quad (4.34)$$

Thus, choosing  $l_3 = \lceil \frac{1}{2} \log_{2\pi} \frac{8}{\epsilon} \rceil$  guarantees  $|R_{l_3}| < \frac{\epsilon}{2}$ , provided  $a > \lceil \beta + 2l_3 \rceil$ .  $\square$

**Corollary 4.6.** *The Bernoulli numbers satisfy  $B_0 = 1$ , and for all  $q \geq 1$ ,*

$$\sum_{p=0}^q \binom{q+1}{p} B_p = 0. \quad (4.35)$$

The Bernoulli numbers can be computed efficiently using the Akiyama–Tanigawa algorithm<sup>3</sup>, with a complexity  $O(p^2)$  for computing  $B_p$ .

**Lemma 4.7** ( $\widehat{S(a, b, \beta)}$  calculation oracle). *Let  $\mathcal{S}(\beta)$  be an oracle implementing*

$$\sum_{n_0 \leq a \leq b \leq n_1-1} \alpha_{ab} |a\rangle |b\rangle |0\rangle \mapsto \sum_{n_0 \leq a \leq b \leq n_1-1} \alpha_{ab} |a\rangle |b\rangle |\widehat{S(a, b, \beta)}\rangle, \quad (4.36)$$

where  $\widehat{S(a, b, \beta)}$  is an  $\frac{\epsilon}{2}$ -approximation of  $S(a, b, \beta)$  as defined in Equation (4.28), and therefore an  $\epsilon$ -approximation of  $S(a, b, \beta)$ . Then  $\mathcal{S}(\beta)$  can be constructed using

$$\text{Poly}(\log(1/\epsilon), \log(n_1), \log\left(\frac{1}{1-\beta}\right), v) \quad (4.37)$$

gates and ancilla qubits, where  $l_3 = \lceil \frac{1}{2} \log_{2\pi} \frac{8}{\epsilon} \rceil$ ,  $n_0 > \beta + 2l_3$ , and  $v$  is the number of significant digits of  $\beta$ .

*Proof sketch.* We compute  $\widehat{S(a, b, \beta)}$ , as defined in Equation (4.28), with an error of at most  $\epsilon/2$  by evaluating its exponential terms and finite Bernoulli-series sums:

$$\begin{aligned} \widehat{S(a, b, \beta)} &= b^{-\beta-2l_3+1} \left( \frac{1}{1-\beta} b^{2l_3} + \frac{1}{2} b^{2l_3-1} - \sum_{r=1}^{l_3} \frac{B_{2r} \Gamma(\beta + 2r - 1)}{(2r)! \Gamma(\beta)} b^{2l_3-2r} \right) \\ &\quad - a^{-\beta-2l_3+1} \left( \frac{1}{1-\beta} a^{2l_3} - \frac{1}{2} a^{2l_3-1} - \sum_{r=1}^{l_3} \frac{B_{2r} \Gamma(\beta + 2r - 1)}{(2r)! \Gamma(\beta)} a^{2l_3-2r} \right) \\ &= b^{-\beta-2l_3+1} P_b(\beta) - a^{-\beta-2l_3+1} P_a(\beta), \end{aligned} \quad (4.38)$$

where

$$P_b(\beta) = \frac{1}{1-\beta} b^{2l_3} + \frac{1}{2} b^{2l_3-1} - \sum_{r=1}^{l_3} \frac{B_{2r} \Gamma(\beta+2r-1)}{(2r)! \Gamma(\beta)} b^{2l_3-2r},$$

$$P_a(\beta) = \frac{1}{1-\beta} a^{2l_3} - \frac{1}{2} a^{2l_3-1} - \sum_{r=1}^{l_3} \frac{B_{2r} \Gamma(\beta+2r-1)}{(2r)! \Gamma(\beta)} a^{2l_3-2r}.$$

Define the  $r$ -th term in the sum of  $P_b(\beta)$ :

$$T_b(r) = \frac{B_{2r} \Gamma(\beta+2r-1)}{(2r)! \Gamma(\beta)} b^{2l_3-2r}.$$

Then the ratio of consecutive terms is

$$\left| \frac{T_b(r+1)}{T_b(r)} \right| = \left| \frac{B_{2r+2}}{B_{2r}} \right| \frac{(\beta+2r-1)(\beta+2r)}{(2r+2)(2r+1)} \frac{1}{b^2}.$$

Using the bounds of Bernoulli number

$$\frac{2(2r)!}{(2\pi)^{2r}} \frac{1}{1-2^{-2r}} < |B_{2r}| = \frac{2(2r)!}{(2\pi)^{2r}} \zeta(2r) < \frac{2(2r)!}{(2\pi)^{2r}} \frac{1}{1-2^{1-2r}}, \quad (4.39)$$

for  $b > \beta + 2l_3$ , we obtain:

$$\left| \frac{T_b(r+1)}{T_b(r)} \right| < \frac{(\beta+2r-1)(\beta+2r)(1-2^{-2r})}{(2\pi)^2 b^2 (1-2^{1-2(r+1)})} < \frac{1}{2\pi^2}.$$

Thus the Bernoulli series decreases geometrically,

$$\left| \sum_{r=1}^{l_3} \frac{B_{2r} \Gamma(\beta+2r-1)}{(2r)! \Gamma(\beta)} b^{2l_3-2r} \right| < \left| \frac{B_2 \beta b^{2l_3-2}}{2 \left(1 - \frac{1}{2\pi^2}\right)} \right| < \frac{\beta b^{2l_3-2}}{6} < \frac{b^{2l_3-1}}{2}. \quad (4.40)$$

By combining the fact that  $\frac{b^{2l_3-1}}{2} < \frac{b^{2l_3}}{2|1-\beta|}$ , we obtain

$$|P_b(\beta)| < \frac{2b^{2l_3}}{|1-\beta|}, \quad (4.41)$$

and similarly,

$$|P_a(\beta)| < \frac{2a^{2l_3}}{|1-\beta|}. \quad (4.42)$$

Hence, to achieve overall precision  $\frac{\epsilon}{2}$ , it suffices to:

1. Compute  $a^{-\beta-2l_3+1}$  and  $b^{-\beta-2l_3+1}$  to precisions:

$$\frac{\epsilon|1-\beta|}{16a^{2l_3}} \quad \text{and} \quad \frac{\epsilon|1-\beta|}{16b^{2l_3}}, \quad (4.43)$$

respectively. We will prove in Proposition 4.8 that these require at most

$$\text{Poly}(\log(n_1), \log\left(\frac{1}{|1-\beta|}\right), \log(1/\epsilon), v) \quad (4.44)$$

gates and ancilla qubits.

2. Compute the polynomial-Bernoulli sums  $P_a(\beta)$  and  $P_b(\beta)$  to precision  $\frac{\epsilon}{8}$ , since  $a^{-\beta-2l_3+1}$  and  $b^{-\beta-2l_3+1}$  are both smaller than 1. We will prove in Proposition 4.9 that these require:

$$\text{Poly}(\log(1/\epsilon), \log(n_1), \log\left(\frac{1}{|1-\beta|}\right), v) \quad (4.45)$$

gates and ancilla qubits.

3. Perform final multiplications and additions to combine terms. As the exponential terms and Bernoulli-series sums require at most

$$\log\left(\frac{16n_1^{2l_3}}{|1-\beta|\epsilon}\right), \quad \log\left(\frac{2n_1^{2l_3}}{|1-\beta|}\right) + \log\left(\frac{8}{\epsilon}\right)$$

significant qubits, respectively.

Conclusively, the total number of required gates and ancilla qubits can be bounded by

$$\text{Poly}(\log(1/\epsilon), \log(n_1), \log\left(\frac{1}{|1-\beta|}\right), v), \quad (4.46)$$

given that  $l_3 = \lceil \frac{1}{2} \log_{2\pi} \frac{8}{\epsilon} \rceil$ . Hence the Lemma follows. Next, we detail Proposition 4.8 and Proposition 4.9.  $\square$

**Proposition 4.8.** *The oracles*

$$\sum_{b=n_0}^{n_1-1} \alpha_b |b\rangle |0\rangle \mapsto \sum_{b=n_0}^{n_1-1} \alpha_b |b\rangle |\widetilde{b^{-\beta-2l_3+1}}\rangle \quad \text{and} \quad \sum_{a=n_0}^{n_1-1} \alpha_a |a\rangle |0\rangle \mapsto \sum_{a=n_0}^{n_1-1} \alpha_a |a\rangle |\widetilde{a^{-\beta-2l_3+1}}\rangle \quad (4.47)$$

can be constructed with error bounds

$$|\widetilde{b^{-\beta-2l_3+1}} - b^{-\beta-2l_3+1}| < \frac{\epsilon|1-\beta|}{16b^{2l_3}}, \quad |\widetilde{a^{-\beta-2l_3+1}} - a^{-\beta-2l_3+1}| < \frac{\epsilon|1-\beta|}{16a^{2l_3}}, \quad (4.48)$$

using

$$\text{Poly}(\log(n_1), \log\left(\frac{1}{|1-\beta|}\right), \log(1/\epsilon), v) \quad (4.49)$$

gates and ancilla qubits, where  $n_0 > \beta + 2l_3$ , and  $v$  denotes the number of significant digits of  $\beta$ .

*Proof.* We focus on constructing the oracle for  $\widetilde{b^{-\beta-2l_3+1}}$ ; the case for  $a$  is analogous. Writing  $b^{-\beta-2l_3+1} = 2^{-(\beta+2l_3-1)\log b}$ , the computation proceeds by approximating  $\log b$ , multiplying by  $-(\beta + 2l_3 - 1)$ , and exponentiating. We require the approximation errors from the logarithm and from the exponentiation to be both bounded by  $\frac{\epsilon|1-\beta|}{32b^{2l_3}}$ , so that the total error is bounded by  $\frac{\epsilon|1-\beta|}{16b^{2l_3}}$ .

**Step 1: Approximating  $\log(b)$ .** If  $(\beta + 2l_3 - 1)|\widetilde{\log(b)} - \log(b)| < \frac{1}{2}$ , then

$$\begin{aligned} & |2^{-(\beta+2l_3-1)\log(b)} - 2^{-(\beta+2l_3-1)\widetilde{\log(b)}}| \\ &= 2^{-(\beta+2l_3-1)\log(b)} \left| 1 - 2^{-(\beta+2l_3-1)(\widetilde{\log(b)} - \log(b))} \right| \\ &< b^{-\beta-2l_3+1} (\beta + 2l_3 - 1) |\widetilde{\log(b)} - \log(b)|, \end{aligned} \quad (4.50)$$

since  $|1 - 2^x| \leq |x|$  for  $|x| \leq \frac{1}{2}$ . To bound this error by  $\frac{\epsilon|1-\beta|}{32b^{2l_3}}$ , it suffices to compute  $\log(b)$  to precision

$$\frac{\epsilon|1-\beta|}{32b^{2l_3}} \frac{b^{\beta+2l_3-1}}{(\beta + 2l_3 - 1)} = \frac{b^{\beta-1}\epsilon|1-\beta|}{32(\beta + 2l_3 - 1)} > \frac{1}{32} n_1^{-2} |1-\beta| \epsilon, \quad (4.51)$$

which satisfies  $\frac{1}{32} n_1^{-2} |1-\beta| \epsilon (\beta + 2l_3 - 1) < \frac{1}{32} \epsilon < \frac{1}{2}$ . Therefore, we set the required qubit of precision as

$$p_1 = \log\left(32n_1^2 \frac{1}{|1-\beta|} \frac{1}{\epsilon}\right) = 5 + 2\log(n_1) + \log\left(\frac{1}{|1-\beta|}\right) + \log\left(\frac{1}{\epsilon}\right). \quad (4.52)$$

By Lemma 3.2, computing  $\log(b)$  to  $p_1$  digits of precision requires

$$\mathcal{O}(\log(n_1)^3 p_1^2) \text{ gates and } \mathcal{O}(\log(n_1)^2 p_1) \text{ ancilla qubits.}$$

**Step 2: Multiplication with  $\beta + 2l_3 - 1$ .** Multiplying  $\log b$  by  $\beta + 2l_3 - 1$ , which are represented to at most  $\log(n_1) + p_1$  and  $\log(n_0) + v$  bits respectively, requires:

$$(\log(n_1) + p_1)(\log(n_0) + v) \text{ gates and } (\log(n_1) + p_1) + (\log(n_0) + v) \text{ ancilla qubits,}$$

where  $v$  is the number of significant digits of  $\beta$ .

**Step 3: Exponentiation.** Decompose

$$b^{-\beta-2l_3+1} = 2^{\lfloor -(\beta+2l_3-1)\log(b) \rfloor} \cdot 2^{\{-(\beta+2l_3-1)\log(b)\}}, \quad (4.53)$$

where  $\lfloor y \rfloor$  denote the nearest integer of  $y$  and  $\{y\} = y - \lfloor y \rfloor$  denote the fractional part. The fractional exponential is evaluated by:

$$2^x = e^{\ln 2 \cdot x} = \sum_{n=0}^{\infty} \frac{(\ln 2)^n}{n!} x^n, \quad -\frac{1}{2} \leq x < \frac{1}{2}. \quad (4.54)$$

To bound the total error by  $\frac{\epsilon|1-\beta|}{32b^{2l_3}}$ , we target an error of

$$\frac{\epsilon|1-\beta|}{32b^{2l_3}} \frac{1}{\sqrt{2}b^{-(\beta+2l_3-1)}} = \frac{b^{\beta+2l_3-1}\epsilon|1-\beta|}{32\sqrt{2}b^{2l_3}} > \frac{1}{64}b^{\beta-1}|1-\beta|\epsilon > \frac{1}{64}n_1^{-1}|1-\beta|\epsilon. \quad (4.55)$$

in fractional exponential. Let

$$l_4 = \log\left(64n_1 \frac{1}{|1-\beta|} \frac{1}{\epsilon}\right) = 6 + \log(n_1) + \log\left(\frac{1}{|1-\beta|}\right) + \log\left(\frac{1}{\epsilon}\right). \quad (4.56)$$

Because  $|x| \leq \frac{1}{2}$ , truncating the exponential series at degree  $l_4$  gives an error

$$\frac{2(\ln 2/2)^{l_4}}{(l_4)!} < \frac{1}{2^{l_4+1}} = \frac{1}{128}n_1^{-1}|1-\beta|\epsilon. \quad (4.57)$$

With coefficients stored with  $l_4 + 1$  fractional qubits, the rounding error is at most

$$\frac{1}{128}n_1^{-1}|1-\beta|\epsilon(1 + \frac{1}{2} + \frac{1}{4} + \dots) \leq \frac{1}{128}n_1^{-1}|1-\beta|\epsilon \leq \frac{1}{128}n_1^{\beta-1}|1-\beta|\epsilon, \quad (4.58)$$

yielding a total error at most  $\frac{1}{64}n_1^{-1}|1-\beta|\epsilon$ .

By Lemma 3.1, evaluating the degree- $l_4$  polynomial in the argument  $\{-(\beta + 2l_3 - 1)\log(b)\}$ , which is represented with at most  $(p_1 + \log(n_1) + \log(n_0) + v)$  bits through multiplication, and with coefficients stored with  $l_4 + 1$  qubits, to achieve precision  $\frac{\epsilon|1-\beta|}{32b^{2l_3}}$  requires

$$\begin{aligned} & l_4^2(p_1 + \log(n_0) + \log(n_1) + v)^2 + l_4^2(p_1 + \log(n_0) + \log(n_1) + v)(l_4 + 1) + \log\left(\frac{32b^{2l_3}}{|1-\beta|\epsilon}\right)l_4 \\ & = \text{Poly}(\log(n_1), \log\left(\frac{1}{|1-\beta|}\right), \log\left(\frac{1}{\epsilon}\right), v) \end{aligned} \quad (4.59)$$

gates, and

$$2(p_1 + \log(n_0) + \log(n_1) + v)^2l_4 + l_4 + 1 = \text{Poly}(\log(n_1), \log\left(\frac{1}{|1-\beta|}\right), \log\left(\frac{1}{\epsilon}\right), v) \quad (4.60)$$

ancilla qubits. Thus, combine the three parts and the claimed resource bounds follow.  $\square$

**Proposition 4.9.** *The oracles*

$$\sum_{b=n_0}^{n_1-1} \alpha_b |b\rangle |0\rangle \mapsto \sum_{b=n_0}^{n_1-1} \alpha_b |b\rangle |P_b(\beta)\rangle \quad \text{and} \quad \sum_{a=n_0}^{n_1-1} \alpha_a |a\rangle |0\rangle \mapsto \sum_{a=n_0}^{n_1-1} \alpha_a |a\rangle |P_a(\beta)\rangle, \quad (4.61)$$

where

$$\begin{aligned} P_b(\beta) &= \frac{1}{1-\beta}b^{2l_3} + \frac{1}{2}b^{2l_3-1} - \sum_{r=1}^{l_3} \frac{B_{2r}\Gamma(\beta+2r-1)}{(2r)!\Gamma(\beta)}b^{2l_3-2r}, \\ P_a(\beta) &= \frac{1}{1-\beta}a^{2l_3} - \frac{1}{2}a^{2l_3-1} - \sum_{r=1}^{l_3} \frac{B_{2r}\Gamma(\beta+2r-1)}{(2r)!\Gamma(\beta)}a^{2l_3-2r}, \end{aligned} \quad (4.62)$$

can be constructed to precision  $\frac{\epsilon}{8}$  using

$$\text{Poly}(\log(1/\epsilon), \log(n_1), \log\left(\frac{1}{|1-\beta|}\right)) \quad (4.63)$$

gates and ancilla qubits, in which  $n_0 > \beta + 2l_3$ .

*Proof.* We focus on constructing the oracle for  $P_b(\beta)$ , as the case for  $P_a(\beta)$  is analogous. All the coefficients are stored with precision  $\frac{\epsilon}{16n_1^{2l_3}}$ , so the total rounding is bounded by

$$\frac{\epsilon}{16n_1^{2l_3}}(b^{2l_3} + b^{2l_3-1} + \dots) < \frac{\epsilon}{16n_1^{2l_3}} 2b^{2l_3} \leq \frac{\epsilon}{8}. \quad (4.64)$$

Hence the required number of qubit for each coefficient is at most

$$p_2 = \log\left(\frac{16n_1^{2l_3}}{\epsilon}\right) = \log(1/\epsilon) + 4 + 2l_3 \log(n_1). \quad (4.65)$$

The polynomial in Equation (4.62) has degree  $2l_3$ , with input  $b$  requiring at most  $\log(n_1)$  qubits, and the output targeted to precision  $\frac{\epsilon}{8}$  with absolute magnitude bounded by  $\log\left(\frac{2}{|1-\beta|} n_1^{2l_3}\right)$ . Lemma 3.1 implies that this computation can be performed using at most

$$\begin{aligned} & l_3^2 \log^2(n_1) + l_3^2 \log(n_1)p_2 + l_3 \left( \log\left(\frac{2}{|1-\beta|} n_1^{2l_3}\right) + \log\left(\frac{8}{\epsilon}\right) \right) \\ & = \text{Poly}\left(\log(n_1), \log\left(\frac{1}{|1-\beta|}\right), \log\left(\frac{1}{\epsilon}\right)\right) \end{aligned} \quad (4.66)$$

gates, and

$$2l_3 \log(n_1) + p_2 = \text{Poly}(\log(n_1), \log(1/\epsilon)) \quad (4.67)$$

ancilla qubits.  $\square$

**Corollary 4.10** (Extended state preparation). *Let  $\beta > 0$ ,  $\beta \neq 1$ . Define*

$$|\psi_0\rangle_e = \frac{1}{C} \sum_{n=1}^{n_1-1} n^{-\beta/2} |n\rangle, \quad C = \sqrt{\sum_{n=1}^{n_1-1} n^{-\beta}}, \quad (4.68)$$

where  $c = \lceil \frac{1}{2} \log_{2\pi} \frac{24}{\epsilon} \rceil$ ,  $n_0 - 1$  is the smallest power of 2 greater than  $\lceil \beta + 2c \rceil$ , and  $n_1 - n_0$  is a power of 2. Then the state  $|\psi_0\rangle_e$  can be prepared on a gate-based quantum computer to precision  $\epsilon > 0$  using

$$\text{Poly}(\log(1/\epsilon), \log(n_1), \log\left(\frac{1}{|1-\beta|}\right), \beta, v), \quad (4.69)$$

gates and ancilla qubits, where  $v$  is the number of significant digits used to represent  $\beta$ .

*Proof.* By Theorem 4.2, the truncated state

$$|\psi_0\rangle = \frac{1}{C} \sum_{n=n_0}^{n_1-1} n^{-\beta/2} |n\rangle \quad (4.70)$$

can be prepared to precision  $\frac{\epsilon}{3}$  with

$$\text{Poly}(\log(1/\epsilon), \log(n_1), \log\left(\frac{1}{|1-\beta|}\right), \beta, v) \quad (4.71)$$

gates and ancilla qubits, for  $c = \lceil \frac{1}{2} \log_{2\pi} \frac{24}{\epsilon} \rceil$  and  $n_0$  greater than  $\lceil \beta + 2c \rceil + 1$ . Following the approach of direct amplitude splitting<sup>4</sup>, we can also prepare

$$|\psi_1\rangle = \frac{1}{C_1} \sum_{n=1}^{n_0-1} n^{-\beta/2} |n\rangle, \quad (4.72)$$

to precision  $\frac{\epsilon}{3}$ , using  $\text{Poly}(n_0, \log(1/\epsilon))$  gates. An auxiliary qubit coherently combines the two states:

$$\frac{|0\rangle + \gamma|1\rangle}{\sqrt{\gamma^2 + 1}} |0\rangle \rightarrow \frac{|0\rangle|\psi_0\rangle + \gamma|1\rangle|\psi_1\rangle}{\sqrt{\gamma^2 + 1}}. \quad (4.73)$$

Applying a Hadamard gate gives:

$$\xrightarrow{H} \frac{(|0\rangle + |1\rangle)|\psi_0\rangle + \gamma(|0\rangle - |1\rangle)|\psi_1\rangle}{\sqrt{2\gamma^2 + 2}} = \frac{|0\rangle(|\psi_0\rangle + \gamma|\psi_1\rangle) + |1\rangle(|\psi_0\rangle - \gamma|\psi_1\rangle)}{\sqrt{2\gamma^2 + 2}}. \quad (4.74)$$

Here,  $\gamma = \frac{C_1}{C} = \sqrt{\frac{S(1, n_0 - 1, \beta)}{S(n_0, n_1 - 1, \beta)}}$ , where the denominator estimated via Euler-Maclaurin summation method and the numerator is computed directly. If the ancilla is measured in  $|0\rangle$ , the desired normalized superposition is obtained. If not, a correction step—using an additional register for comparison with  $n_0$  and a controlled- $Z$  operation—restores the target state. The comparator writes a 1 in an auxiliary qubit iff the index is smaller than  $n_0$ . The process is listed as follows:

$$(|\psi_0\rangle - \gamma|\psi_1\rangle)|0\rangle \xrightarrow{\text{comparator}} |\psi_0\rangle|0\rangle - \gamma|\psi_1\rangle|1\rangle \xrightarrow{\text{controlled-}Z} |\psi_0\rangle|0\rangle + \gamma|\psi_1\rangle|1\rangle \xrightarrow{\text{undo comparator}} (|\psi_0\rangle + \gamma|\psi_1\rangle)|0\rangle. \quad (4.75)$$

If  $\gamma$  is approximated by  $\tilde{\gamma}$ , the error is bounded by

$$\begin{aligned} \left\| \frac{|\psi_0\rangle + \tilde{\gamma}|\psi_1\rangle}{\sqrt{1 + \tilde{\gamma}^2}} - \frac{|\psi_0\rangle + \gamma|\psi_1\rangle}{\sqrt{1 + \gamma^2}} \right\| &= \sqrt{2 - 2 \frac{1 + \gamma\tilde{\gamma}}{\sqrt{(1 + \gamma^2)(1 + \tilde{\gamma}^2)}}} = \sqrt{2 - 2 \sqrt{1 - \frac{(\gamma - \tilde{\gamma})^2}{(1 + \gamma^2)(1 + \tilde{\gamma}^2)}}} \\ &< \sqrt{2 - 2 \sqrt{1 - (\gamma - \tilde{\gamma})^2}} < \sqrt{2}|\gamma - \tilde{\gamma}|. \end{aligned} \quad (4.76)$$

Thus, computing  $\gamma$  to precision  $\frac{\varepsilon^2}{18}$  ensures an additional error at most  $\frac{\varepsilon}{3}$ . This can be achieved by estimating  $C$  with error  $n_0^{-\beta} \frac{\varepsilon^2}{36}$  and  $C_1$  with error  $\frac{\varepsilon^2}{36} \frac{C^2}{C_1} > \frac{\varepsilon^2}{36} \frac{n_0^{-2\beta}}{n_0} = \frac{\varepsilon^2}{36} n_0^{-1-2\beta}$  using Euler-Maclaurin summation with  $\text{Poly}(\log(1/\varepsilon), \log(\frac{1}{1-\beta}), \beta, \log(n_1), v)$  classical computations. Hence,  $|\psi_0\rangle_e$  can be prepared with accuracy  $\varepsilon$  using

$$\text{Poly}(\log(1/\varepsilon), \log(n_1), \log(\frac{1}{1-\beta}), \beta, v) \quad (4.77)$$

gates and ancilla qubits.  $\square$

**Theorem 4.11** (Initial state preparation (Methods, Theorem 3)). *Let  $\beta > 0$ ,  $\beta \neq 1$  and  $N \in \mathbb{N}$ . Define*

$$|\psi_0\rangle = \frac{1}{C} \sum_{n=1}^N n^{-\beta/2} |n\rangle, \quad C = \sqrt{\sum_{n=1}^N n^{-\beta}}. \quad (4.78)$$

*Then  $|\psi_0\rangle$  can be prepared on a quantum computer to precision  $\varepsilon > 0$ , with success probability at least  $(\frac{1}{2} - \frac{\varepsilon}{3})$ . The required number of gates and ancilla qubits is bounded by*

$$\text{Poly}(\log(1/\varepsilon), \log(N), \log(\frac{1}{1-\beta}), \beta, v), \quad (4.79)$$

*where  $v$  denotes the number of significant digits used to represent  $\beta$ .*

*Proof.* Set  $c = \left\lceil \frac{1}{2} \log_{2\pi} \left( \frac{144}{\varepsilon} \right) \right\rceil$ , and choose  $n_0$  so that  $(n_0 - 1)$  is the smallest power of 2 larger than  $\lceil \beta + 2c \rceil$ . Let  $n_1$  be the smallest integer larger than  $N$  with  $n_1 - n_0$  a power of 2. By Corollary 4.10, the extended state

$$|\psi_0\rangle = \frac{1}{C} \sum_{n=1}^{n_1-1} n^{-\beta/2} |n\rangle \quad (4.80)$$

can be constructed to precision  $\frac{\varepsilon}{6}$  using

$$\text{Poly}(\log(1/\varepsilon), \log(n_1), \log(\frac{1}{1-\beta}), \beta, v) = \text{Poly}(\log(1/\varepsilon), \log(N), \log(\frac{1}{1-\beta}), \beta, v) \quad (4.81)$$

gates and ancilla qubits.

Let  $P$  denote the projector onto the subspace spanned by  $\{|n\rangle : 1 \leq n \leq N\}$ , given by:

$$P = \sum_{n=1}^N |n\rangle \langle n|, \quad (4.82)$$

which can be implemented using an ancilla qubit, a comparator, and a measurement. After projection  $P$ , the system ideally collapses to the desired state

$$|\psi\rangle = \frac{1}{C} \sum_{n=1}^N n^{-\beta/2} |n\rangle \quad (4.83)$$

with ideal success possibility

$$\frac{\sum_{n=1}^N n^{-\beta}}{\sum_{n=1}^{n_1-1} n^{-\beta}} > \frac{N}{n_1 - 1} \geq \frac{N}{2(N - n_0) + n_0 - 1} \geq \frac{N}{2N - 3} > \frac{1}{2}, \quad (4.84)$$

since  $n^{-\beta}$  is positive and decreasing for  $\beta > 0$ .

In practice, the extended state is prepared to precision  $\frac{\varepsilon}{6}$ . Let  $|\psi_0\rangle$  and  $|\widetilde{\psi}_0\rangle_e$  denote the ideal and actual extended state. Then the ideal and actual post-selected states can be written as

$$|\psi_0\rangle = \frac{P|\psi_0\rangle_e}{\sqrt{\langle\psi_0|_e P|\psi_0\rangle_e}}, \quad |\widetilde{\psi}_0\rangle = \frac{P|\widetilde{\psi}_0\rangle_e}{\sqrt{\langle\widetilde{\psi}_0|_e P|\widetilde{\psi}_0\rangle_e}}. \quad (4.85)$$

The precision in  $|\widetilde{\psi}_0\rangle_e$  and the contractive property of  $P$  imply that

$$\|\sqrt{\langle\psi_0|_e P|\psi_0\rangle_e}|\psi_0\rangle - \sqrt{\langle\widetilde{\psi}_0|_e P|\widetilde{\psi}_0\rangle_e}|\widetilde{\psi}_0\rangle\| = \|P|\psi_0\rangle_e - P|\widetilde{\psi}_0\rangle_e\| \leq \| |\psi_0\rangle_e - |\widetilde{\psi}_0\rangle_e \| \leq \frac{\varepsilon}{6}. \quad (4.86)$$

Furthermore, using the triangle inequality

$$|\langle\psi_0|_e P|\psi_0\rangle_e - \langle\widetilde{\psi}_0|_e P|\widetilde{\psi}_0\rangle_e| \leq |\langle\psi_0|_e P|\widetilde{\psi}_0\rangle_e - \langle\widetilde{\psi}_0|_e P|\widetilde{\psi}_0\rangle_e| + |\langle\psi_0|_e P|\psi_0\rangle_e - \langle\psi_0|_e P|\widetilde{\psi}_0\rangle_e| \leq \frac{\varepsilon}{3}. \quad (4.87)$$

Since  $\langle\psi_0|_e P|\psi_0\rangle_e \geq \frac{1}{2}$ , it follows that

$$\left| \sqrt{\langle\psi_0|_e P|\psi_0\rangle_e} - \sqrt{\langle\widetilde{\psi}_0|_e P|\widetilde{\psi}_0\rangle_e} \right| = \frac{|\langle\psi_0|_e P|\psi_0\rangle_e - \langle\widetilde{\psi}_0|_e P|\widetilde{\psi}_0\rangle_e|}{\sqrt{\langle\psi_0|_e P|\psi_0\rangle_e} + \sqrt{\langle\widetilde{\psi}_0|_e P|\widetilde{\psi}_0\rangle_e}} \leq \frac{\sqrt{2}\varepsilon}{3}. \quad (4.88)$$

Using the triangle inequality and combining the Equations (4.86) and (4.88),

$$\begin{aligned} & \|\sqrt{\langle\psi_0|_e P|\psi_0\rangle_e}|\psi_0\rangle - \sqrt{\langle\widetilde{\psi}_0|_e P|\widetilde{\psi}_0\rangle_e}|\widetilde{\psi}_0\rangle\| = \|\sqrt{\langle\psi_0|_e P|\psi_0\rangle_e}|\psi_0\rangle - \sqrt{\langle\psi_0|_e P|\psi_0\rangle_e}|\widetilde{\psi}_0\rangle\| \\ & \leq \|\sqrt{\langle\psi_0|_e P|\psi_0\rangle_e}|\psi_0\rangle - \sqrt{\langle\widetilde{\psi}_0|_e P|\widetilde{\psi}_0\rangle_e}|\widetilde{\psi}_0\rangle\| + \|\sqrt{\langle\psi_0|_e P|\psi_0\rangle_e}|\widetilde{\psi}_0\rangle - \sqrt{\langle\widetilde{\psi}_0|_e P|\widetilde{\psi}_0\rangle_e}|\widetilde{\psi}_0\rangle\| \\ & \leq \frac{\varepsilon}{6} + \frac{\sqrt{2}\varepsilon}{3}. \end{aligned} \quad (4.89)$$

Given  $\langle\psi_e| P|\psi_e\rangle \geq \frac{1}{2}$ , we have the stated bound

$$\| |\psi_0\rangle - |\widetilde{\psi}_0\rangle \| \leq \frac{1+2\sqrt{2}}{3\sqrt{2}}\varepsilon < \varepsilon, \quad (4.90)$$

and success possibility satisfies

$$\langle\widetilde{\psi}_0|_e P|\widetilde{\psi}_0\rangle_e \geq \frac{1}{2} - \frac{\varepsilon}{3}. \quad (4.91)$$

Thus, the ideal state  $|\psi_0\rangle$  can be prepared with precision  $\varepsilon$  with at least the success probability as claimed.  $\square$

### Supplementary Note 5: Construction of the evolution operator

We now demonstrate the construction of the evolution operator.



**Theorem 5.1** (Evolution operator construction (Methods, Theorem 4)). *Define the time evolution operator*

$$U(t) = e^{-iH_0 t}, \quad H_0 = \sum_{n=1}^N \log(n) |n\rangle\langle n|, \quad (5.1)$$

where the evolution time  $t$  is specified with  $u$  significant digits. Then  $U(t)$  can be implemented to precision  $\xi$  using

$$\text{Poly}(\log(N), \log(|t|), \log(1/\xi), u) \quad (5.2)$$

gates and ancilla qubits.

*Proof.* Consider an input state of the form

$$\sum_{n=1}^N \alpha_n |n\rangle |0\rangle, \quad (5.3)$$

where  $|0\rangle$  represents the ancilla register. Applying the logarithm oracle  $L$  produces

$$\sum_{n=1}^N \alpha_n |n\rangle |\log(n)\rangle. \quad (5.4)$$

Multiplying  $\log(n)$  by  $t$  yields

$$\sum_{n=1}^N \alpha_n |n\rangle |\log(n)t\rangle. \quad (5.5)$$

Applying controlled  $R_z$  rotations results in

$$\sum_{n=1}^N \alpha_n e^{-i \log(n)t} |n\rangle |\log(n)t\rangle. \quad (5.6)$$

Uncomputing the multiplication and applying inverse logarithm oracle  $L^{-1}$  leaves

$$\sum_{n=1}^N \alpha_n e^{-i \log(n)t} |n\rangle |0\rangle = U \sum_{n=1}^N \alpha_n |n\rangle |0\rangle. \quad (5.7)$$

In practice, the logarithm  $\log(n)$  is approximated by  $\widetilde{\log(n)}$  with error at most  $\xi/|t|$ . This ensures that

$$\left\| \sum_{n=1}^N \alpha_n (e^{-i \widetilde{\log(n)} t} - e^{-i \log(n)t}) |n\rangle \right\| \leq 2 \sin\left(\frac{\xi}{2}\right) < \xi. \quad (5.8)$$

Thus, the distance between the achieved and ideal  $U$  is bounded by  $\xi$ . By Lemma 3.2, the logarithm oracle and its inverse can be realized using  $\log^3(N) \log^2(|t|/\xi)$  gates and  $\log^2(N) \log(|t|/\xi)$  ancilla qubits. Multiplying  $\log(n)$  by  $t$  requires  $(\log(|t|/\xi) + \log(N)) u$  gate operations and  $(\log(|t|/\xi) + \log(N)) + u$  ancilla qubits. The controlled  $R_z$  gates can be implemented qubit by qubit with  $\mathcal{O}(\log(N) + \log(|t|/\xi))$  gates. Combining these bounds, the total resource requirement for implementing  $U(t)$  is

$$\text{Poly}(\log(N), \log(|t|), \log(1/\xi), u) \quad (5.9)$$

gates and ancilla qubits, completing the proof.  $\square$

### Supplementary Note 6: Order of $|\chi(s)|$ for $0 < \beta < 1$

Recall that

$$\chi(s) = 2^s \pi^{s-1} \sin\left(\frac{\pi s}{2}\right) \Gamma(1-s). \quad (6.1)$$

Thus,

$$|\chi(s)| = 2^\beta \pi^{\beta-1} \left| \sin \frac{\pi s}{2} \right| |\Gamma(1-s)|. \quad (6.2)$$

We focus on  $s = \beta + it$  with  $0 < \beta < 1$ ,

$$\sin\left(\frac{\pi s}{2}\right) = \sin\left(\frac{\pi\beta}{2} + \frac{i\pi t}{2}\right) = \sin\left(\frac{\pi\beta}{2}\right) \cosh\left(\frac{\pi t}{2}\right) + i \cos\left(\frac{\pi\beta}{2}\right) \sinh\left(\frac{\pi t}{2}\right), \quad (6.3)$$

so we obtain

$$|\sin(\pi s)| = \sqrt{\sin^2\left(\frac{\pi\beta}{2}\right) \cosh^2\left(\frac{\pi t}{2}\right) + \cos^2\left(\frac{\pi\beta}{2}\right) \sinh^2\left(\frac{\pi t}{2}\right)} = \sqrt{\sinh^2\left(\frac{\pi t}{2}\right) + \sin^2\left(\frac{\pi\beta}{2}\right)} = \Theta(e^{\pi|t|/2}). \quad (6.4)$$

Using Stirling's formula in the sector  $|\arg z| \leq \pi - \varepsilon$ ,

$$\Gamma(z) = \sqrt{2\pi} z^{z-\frac{1}{2}} e^{-z} (1 + O(|z|^{-1})). \quad (6.5)$$

Taking absolute values gives

$$|\Gamma(z)| = \sqrt{2\pi} |z|^{z-\frac{1}{2}} e^{-\operatorname{Re}(z)} (1 + O(|z|^{-1})). \quad (6.6)$$

Note that

$$|z^{z-\frac{1}{2}}| = \exp(\operatorname{Re}(\ln(z)(z - \frac{1}{2}))) = \exp(\ln(|z|)(\operatorname{Re}(z) - \frac{1}{2}) - \arg(z) \operatorname{Im}(z)) = |z|^{\operatorname{Re}(z)-\frac{1}{2}} e^{-\arg(z) \operatorname{Im}(z)}. \quad (6.7)$$

Now we set  $z = 1 - s = (1 - \beta) - it$ , then

$$|\Gamma(1-s)| = \sqrt{2\pi} |1-s|^{1/2-\beta} e^{t \arg(z)} e^{-(1-\beta)} (1 + O(|t|^{-1})). \quad (6.8)$$

For  $t < 0$ ,  $\arg z = \arctan\left(\frac{|t|}{1-\beta}\right)$ , so

$$\exp(t \arg z) = \exp\left(t \operatorname{arccot} \frac{1-\beta}{|t|}\right) = \exp\left(t\left(\frac{\pi}{2} - \frac{1-\beta}{|t|} + \mathcal{O}(|t|^{-3})\right)\right) = \exp(-\pi|t|/2) \exp((1-\beta)(1 + \mathcal{O}(|t|^{-2}))). \quad (6.9)$$

For  $t > 0$ ,  $\arg(z) = -\arctan\left(\frac{t}{1-\beta}\right)$ , so

$$\exp(t \arg(z)) = \exp\left(-t \operatorname{arccot} \frac{1-\beta}{t}\right) = \exp\left((-t)\left(\frac{\pi}{2} - \frac{1-\beta}{t} + \mathcal{O}(|t|^{-3})\right)\right) = \exp(-\pi t/2) \exp((1-\beta)(1 + \mathcal{O}(t^{-2}))). \quad (6.10)$$

In both cases,

$$\exp(t \arg z) = \exp(-\pi|t|/2) \exp((1-\beta)(1 + \mathcal{O}(|t|^{-2}))). \quad (6.11)$$

Therefore,

$$|\Gamma(1-s)| = \sqrt{2\pi} |1-s|^{1/2-\beta} \exp(-\pi|t|/2) (1 + \mathcal{O}(|t|^{-1})). \quad (6.12)$$

Combining terms,

$$|\chi(s)| = \Theta(1) 2^\beta \pi^{\beta-1} \exp(\pi|t|/2) \sqrt{2\pi} |1-s|^{1/2-\beta} \exp(-\pi|t|/2) (1 + \mathcal{O}(|t|^{-1})), \quad (6.13)$$

The exponential terms cancel, leaving

$$|\chi(s)| = \Theta(|1-s|^{1/2-\beta}) = \Theta(|t|^{1/2-\beta}). \quad (6.14)$$

### Supplementary Note 7: Upper bound of $\zeta'(s)$ for $0 < \beta < 1$

We establish upper bounds for the Dirichlet eta function  $\eta(s)$  and its derivative  $\eta'(s)$ , defined as

$$\eta(s) = \sum_{n=1}^{\infty} (-1)^{n+1} n^{-s}, \quad \eta'(s) = - \sum_{n=1}^{\infty} (-1)^{n+1} \ln n n^{-s}. \quad (7.1)$$

Then  $\eta(s)$  can be expressed as:

$$\eta(s) = \sum_{n=1}^{\infty} (-1)^{n+1} n^{-s} = \sum_{n=1}^{\infty} ((2n-1)^{-s} - (2n)^{-s}) = \sum_{n=1}^{\infty} s \int_{2n-1}^{2n} \nu^{-s-1} d\nu. \quad (7.2)$$

Taking the absolute value, we obtain

$$|\eta(s)| \leq |s| \sum_{n=1}^{\infty} \int_{2n-1}^{2n} \nu^{-\beta-1} d\nu < |s| \int_1^{\infty} \nu^{-\beta-1} d\nu = \frac{|s|}{\beta}. \quad (7.3)$$

Similarly, for the derivative  $\eta'(s)$ , we have

$$\eta'(s) = - \sum_{n=1}^{\infty} (-1)^{n+1} (\ln n) n^{-s} = \sum_{n=1}^{\infty} (\ln(2n)(2n)^{-s} - \ln(2n-1)(2n-1)^{-s}) = \sum_{n=1}^{\infty} \int_{2n-1}^{2n} (-s\nu^{-s-1} \ln \nu + \nu^{-s-1}) d\nu. \quad (7.4)$$

Hence,

$$|\eta'(s)| \leq |s| \int_1^{\infty} |\nu^{-s-1}| \ln \nu d\nu + \int_1^{\infty} |\nu^{-s-1}| d\nu = |s| \int_1^{\infty} \nu^{-\beta-1} \ln \nu d\nu + \int_1^{\infty} \nu^{-\beta-1} d\nu = \frac{|s|}{\beta^2} + \frac{1}{\beta}. \quad (7.5)$$

Since the zeta function is related to  $\eta(s)$  by

$$\zeta(s) = \frac{1}{1-2^{1-s}} \sum_{n=1}^{\infty} \frac{(-1)^{n+1}}{n^s} = \frac{1}{1-2^{1-s}} \eta(s). \quad (7.6)$$

Its derivative  $\zeta'(s)$  is:

$$\zeta'(s) = \frac{d}{ds} \left( \frac{1}{1-2^{1-s}} \sum_{n=1}^{\infty} \frac{(-1)^{n+1}}{n^s} \right) = \frac{\eta'(s)(1-2^{1-s}) - 2^{1-s} \ln 2 \eta(s)}{(1-2^{1-s})^2}. \quad (7.7)$$

Using the previously established bounds

$$|\eta(s)| \leq \frac{|s|}{\beta}, \quad |\eta'(s)| \leq \frac{|s|}{\beta^2} + \frac{1}{\beta},$$

we obtain the bound for  $\zeta'(s)$ :

$$|\zeta'(s)| \leq \frac{|s|}{|2^{1-\beta} - 1|\beta} + \frac{2^{1-\beta} \ln 2 (|s|\beta + 1)}{|2^{1-\beta} - 1|^2 \beta^2} = \mathcal{O}\left(\frac{|s|}{\beta|1-\beta|} + \frac{|s|\beta + 1}{|1-\beta|^2 \beta^2}\right) = \text{Poly}(|t|, |1-\beta|^{-1}, \beta^{-1}), \quad (7.8)$$

given that  $|2^{1-\beta} - 1| \geq \ln(2)|1-\beta|$  for all  $0 < \beta < 1$ .

- [1] Litinski, D. Quantum schoolbook multiplication with fewer Toffoli gates. *arXiv preprint arXiv:2410.00899* (2024). URL <https://arxiv.org/abs/2410.00899>.
- [2] Grover, L. & Rudolph, T. Creating superpositions that correspond to efficiently integrable probability distributions. *arXiv preprint quant-ph/0208112* (2002). URL <https://arxiv.org/abs/quant-ph/0208112>.
- [3] Akiyama, S. & Tanigawa, Y. Multiple zeta values at non-positive integers. *The Ramanujan Journal* **5**, 327–351 (2001). URL <https://link.springer.com/article/10.1023/A:1013981102941>.
- [4] Long, G.-L. & Sun, Y. Efficient scheme for initializing a quantum register with an arbitrary superposed state. *Phys. Rev. A* **64**, 014303 (2001). URL <https://journals.aps.org/pr/abstract/10.1103/PhysRevA.64.014303>.
